# Supplementary material for: From the single-atom limit to the mixed-metal phase: finding the optimum condition for activating the basal plane of a FePSe3 monolayer towards HER
Source: Royal Society of Chemistry journal article supplement (doi:10.1039/d3cp01317k), 2023-01-01
Supplement: d3cp01317k1.pdf [file d3cp01317k1.pdf]

**Supporting Information for:**

**From the single-atom limit to the mixed-metal**

**phase: Finding the optimum condition for**

**activating the basal plane of a  $\text{FePSe}_3$  monolayer**

**towards HER**

Megha and Prasenjit Sen\*

*Harish-Chandra Research Institute, a CI of HBNI, Chhatnag Road, Jhansi, Prayagraj*  
*211019, India*

E-mail: prasen@hri.res.in

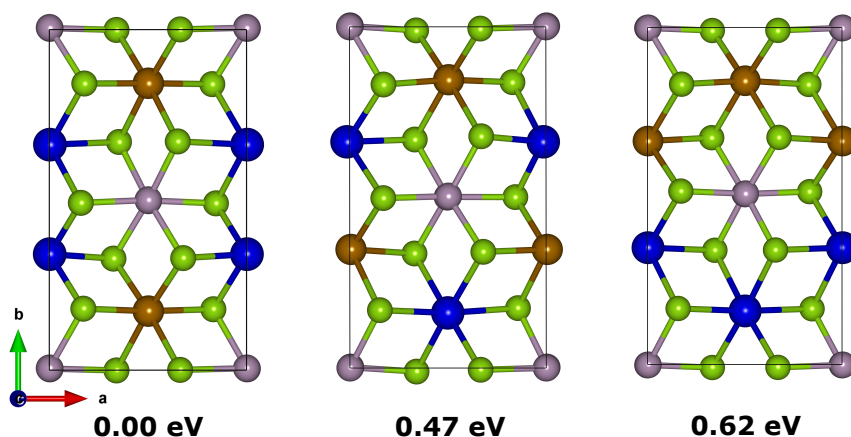

Figure S1: Optimized structures of  $\text{FeTcP}_2\text{Se}_6$  monolayer. The number given below the structures denote the relative energies with respect to the most stable configuration.

Table S1: Lattice parameter of pristine and TM-doped (25%) FePSe<sub>3</sub> monolayers.

| System                | a (Å) |
|-----------------------|-------|
| Pristine              | 6.28  |
| 3d-TM                 |       |
| Sc-FePSe <sub>3</sub> | 6.34  |
| Ti-FePSe <sub>3</sub> | 6.30  |
| V-FePSe <sub>3</sub>  | 6.29  |
| Cr-FePSe <sub>3</sub> | 6.29  |
| Mn-FePSe <sub>3</sub> | 6.30  |
| Co-FePSe <sub>3</sub> | 6.29  |
| Ni-FePSe <sub>3</sub> | 6.24  |
| Cu-FePSe <sub>3</sub> | 6.25  |
| Zn-FePSe <sub>3</sub> | 6.27  |
| 4d-TM                 |       |
| Y-FePSe <sub>3</sub>  | 6.39  |
| Zr-FePSe <sub>3</sub> | 6.32  |
| Nb-FePSe <sub>3</sub> | 6.33  |
| Mo-FePSe <sub>3</sub> | 6.29  |
| Tc-FePSe <sub>3</sub> | 6.30  |
| Ru-FePSe <sub>3</sub> | 6.24  |
| Rh-FePSe <sub>3</sub> | 6.24  |
| Pd-FePSe <sub>3</sub> | 6.26  |
| Ag-FePSe <sub>3</sub> | 6.28  |
| Cd-FePSe <sub>3</sub> | 6.32  |

Table S2: Variation of  $\Delta G_{H^*}$  (in eV) on 6.25% Sc doped FePSe<sub>3</sub> monolayer with applied biaxial tensile strain.

| % Strain | Site |       |      |      |      |      |      |      |
|----------|------|-------|------|------|------|------|------|------|
|          | P2   | Se3   | P1   | P3   | Se5  | Se6  | Se7  | Se8  |
| 0        | 0.35 | 1.08  | 0.38 | 0.35 | 1.59 | 0.66 | 1.19 | 1.29 |
| 1        | 0.30 | 0.92  | 0.42 | 0.32 | 1.02 | 0.64 | 1.05 | 1.16 |
| 2        | 0.21 | 0.49  | 0.32 | 0.24 | 0.61 | 0.48 | 0.58 | 0.64 |
| 3        | 0.23 | 0.35  | 0.31 | 0.29 | 0.52 | 0.48 | 0.59 | 0.56 |
| 4        | 0.20 | 0.22  | 0.21 | 0.24 | 0.42 | 0.37 | 0.39 | 0.40 |
| 5        | 0.14 | -0.05 | 0.18 | 0.18 | 0.27 | 0.23 | 0.19 | 0.13 |

## HER pathways

The Volmer-Heyrovsky pathway involves the following two reaction steps:

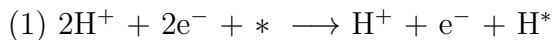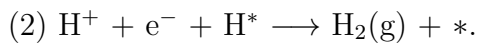

The free energy changes at these intermediate steps at a finite bias and zero pH can be expressed as  $\Delta G_1$  and  $\Delta G_2$ , which are defined as follows.

$$\Delta G_1 = G(\text{H}^+ + \text{e}^-) + G(\text{H}^*) - G(2\text{H}^+ + 2\text{e}^-) - G(*) = \Delta G_{\text{H}^*} + eU,$$

and

$$\Delta G_2 = G(\text{H}_2(\text{g})) + G(*) - G(\text{H}^+ + \text{e}^-) - G(\text{H}^*) = -\Delta G_{\text{H}^*} + eU.$$

The values of  $\Delta G_1$  and  $\Delta G_2$  depend on  $\Delta G_{\text{H}^*}$ , the applied bias ( $U$ ) with respect to the reversible hydrogen electrode (RHE), and the electric charge ( $e$ ).

Another pathway is Volmer–Tafel pathway, in which the intermediate reaction steps are:

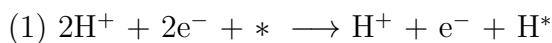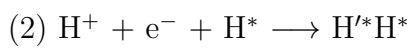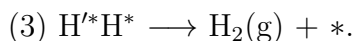

$\text{H}^*$  indicates the first H adsorbed at a particular site, and  $\text{H}'^*$  is the second H which gets adsorbed at a neighbouring site in the presence of first adsorbed H. Free energy changes for these intermediate steps can be written as follows:

$$\Delta G_1 = \Delta G_{\text{H}^*} + eU,$$

$$\Delta G_2 = \Delta G_{\text{H}'^*} + eU,$$

and

$$\Delta G_3 = \Delta G(\text{H}'\text{H}^*) - G(*) - G(\text{H}_2(\text{g})) = -\Delta G_{\text{H}^*} - \Delta G_{\text{H}'^*}.$$

Here,  $\Delta G_{\text{H}^*}$  is the adsorption free energy of the first H and  $\Delta G_{\text{H}'^*}$  is the adsorption free energy of the second H at the neighbouring site in presence of the first adsorbed H.

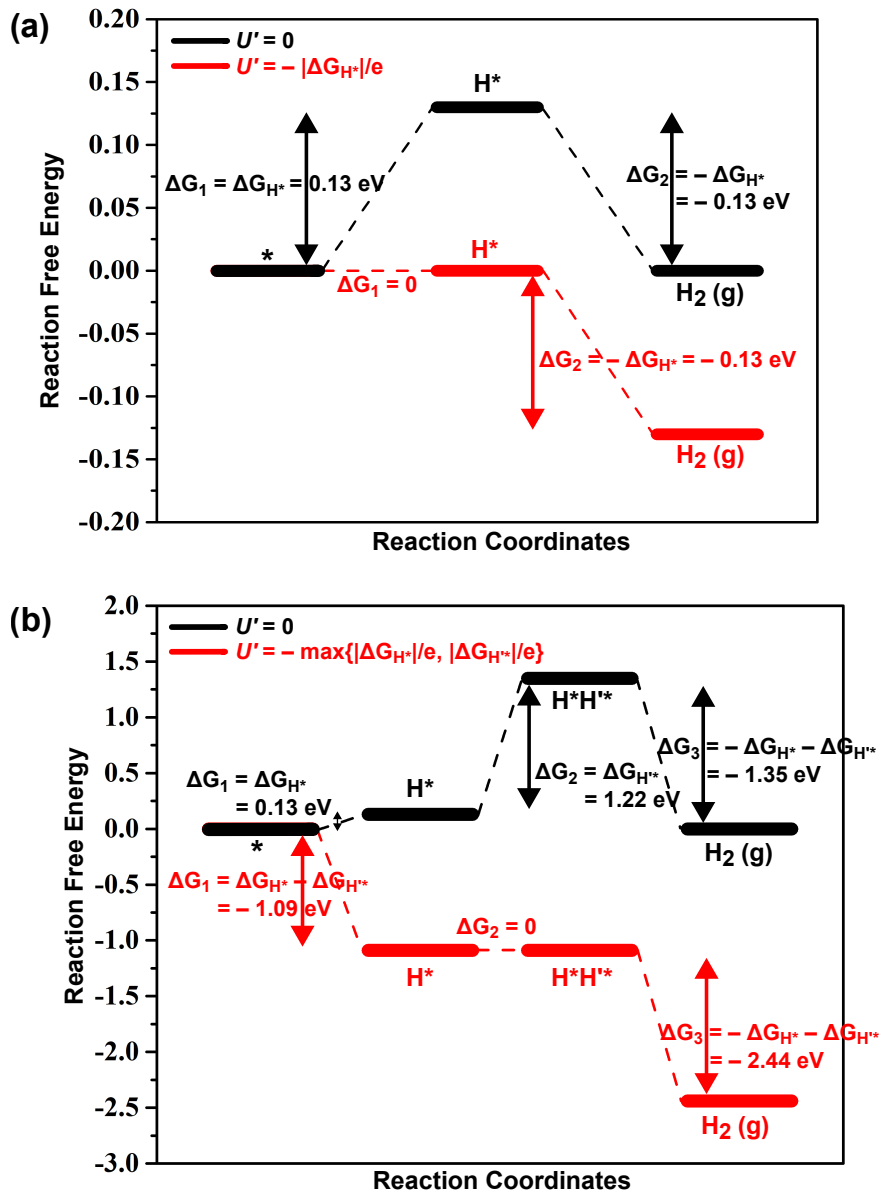

Figure S2: (a) Volmer-Heyrovsky and (b) Volmer-Tafel reaction pathways for the most active site of 25% Tc doped FePSe<sub>3</sub> monolayer.

Table S3: Total magnetic moment ( $M_{\text{total}}$ ) and magnetic moment of each dopant atom ( $M_{\text{dopant}}$ ) in pristine and TM-FePSe<sub>3</sub> monolayers at different doping concentrations. Fe with  $\uparrow$ -spin is replaced by another TM atom.

| System                | 25%                |                     | 12.5%              |                     | 6.25%              |                     |
|-----------------------|--------------------|---------------------|--------------------|---------------------|--------------------|---------------------|
|                       | $M_{\text{total}}$ | $M_{\text{dopant}}$ | $M_{\text{total}}$ | $M_{\text{dopant}}$ | $M_{\text{total}}$ | $M_{\text{dopant}}$ |
| Sc-FePSe <sub>3</sub> | -3.78              | -0.10               | -3.10              | 0.06                | -3.07              | 0.05                |
| Ti-FePSe <sub>3</sub> | -2.01              | 1.68                |                    |                     |                    |                     |
| V-FePSe <sub>3</sub>  | -1.00              | 2.79                |                    |                     |                    |                     |
| Cr-FePSe <sub>3</sub> | 0.01               | 3.83                |                    |                     |                    |                     |
| Mn-FePSe <sub>3</sub> | 0.86               | 4.47                |                    |                     |                    |                     |
| FePSe <sub>3</sub>    | 0.00               | 3.53                |                    |                     |                    |                     |
| Co-FePSe <sub>3</sub> | -2.73              | 1.13                |                    |                     |                    |                     |
| Ni-FePSe <sub>3</sub> | -2.03              | 1.30                |                    |                     |                    |                     |
| Cu-FePSe <sub>3</sub> | -3.01              | 0.24                |                    |                     |                    |                     |
| Zn-FePSe <sub>3</sub> | -3.77              | 0.00                |                    |                     |                    |                     |
| Y-FePSe <sub>3</sub>  | -3.79              | -0.03               | -3.11              | 0.03                | -3.08              | 0.02                |
| Zr-FePSe <sub>3</sub> | -3.79              | 0.24                | -3.74              | -0.21               | -2.48              | 0.62                |
| Nb-FePSe <sub>3</sub> | -0.89              | 2.69                |                    |                     |                    |                     |
| Mo-FePSe <sub>3</sub> | -1.66              | 2.40                | -1.72              | 2.32                | -1.71              | 2.36                |
| Tc-FePSe <sub>3</sub> | -0.94              | 2.69                | -0.92              | 2.74                | -0.92              | 2.74                |
| Ru-FePSe <sub>3</sub> | -3.77              | -0.03               |                    |                     |                    |                     |
| Rh-FePSe <sub>3</sub> | -2.90              | 0.66                | -2.90              | 0.68                | -2.90              | 0.69                |
| Pd-FePSe <sub>3</sub> | -2.20              | 0.83                |                    |                     |                    |                     |
| Ag-FePSe <sub>3</sub> | -3.02              | 0.08                |                    |                     |                    |                     |
| Cd-FePSe <sub>3</sub> | -3.77              | 0.00                |                    |                     |                    |                     |

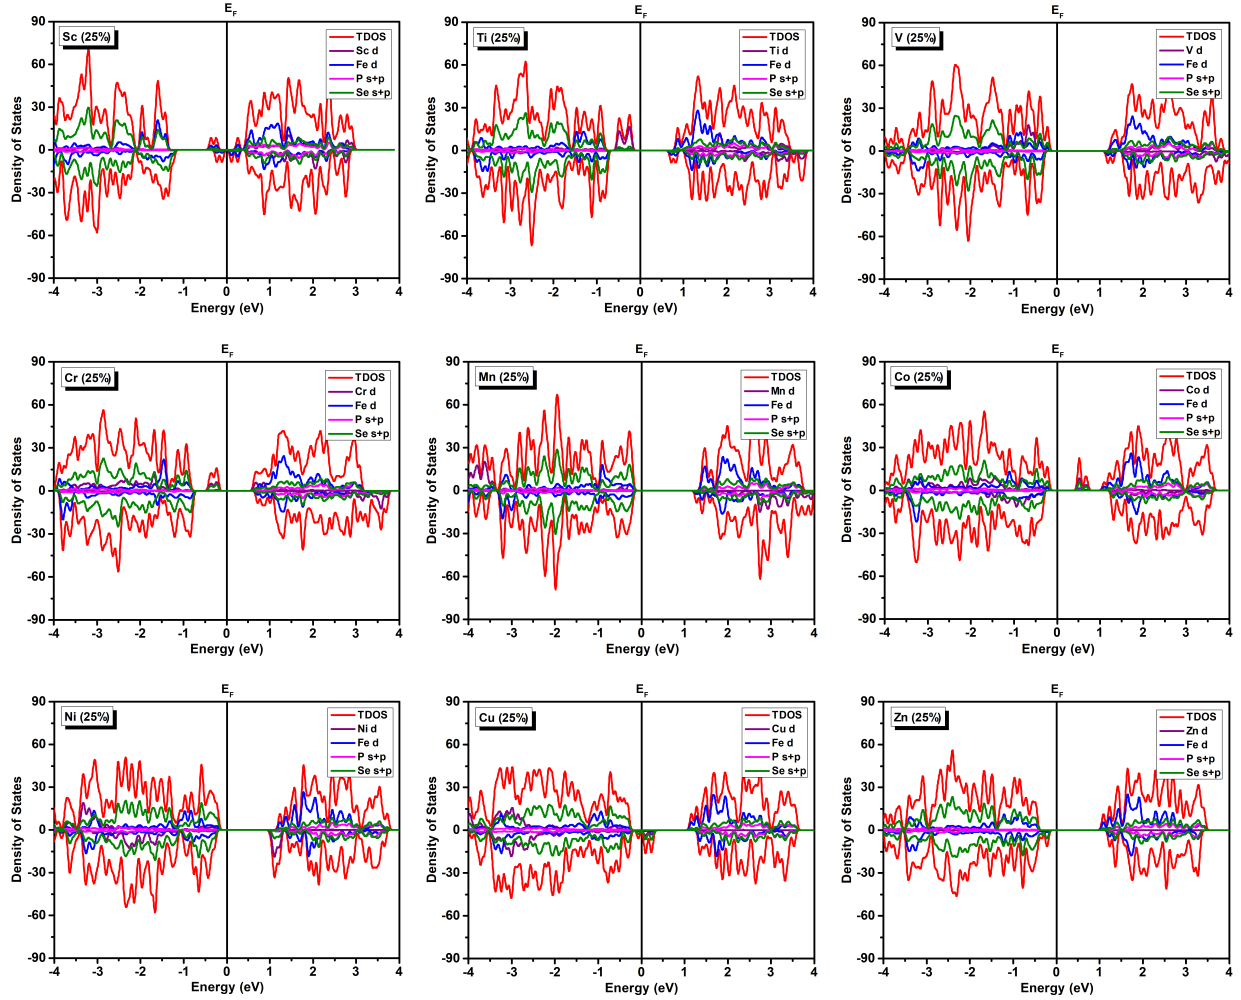

Figure S3: Total as well as the partial DOS of 3d TM-doped FePSe<sub>3</sub> monolayer with 25% doping concentration.  $E_F$  denotes the Fermi energy and is represented by a black colored solid vertical line.

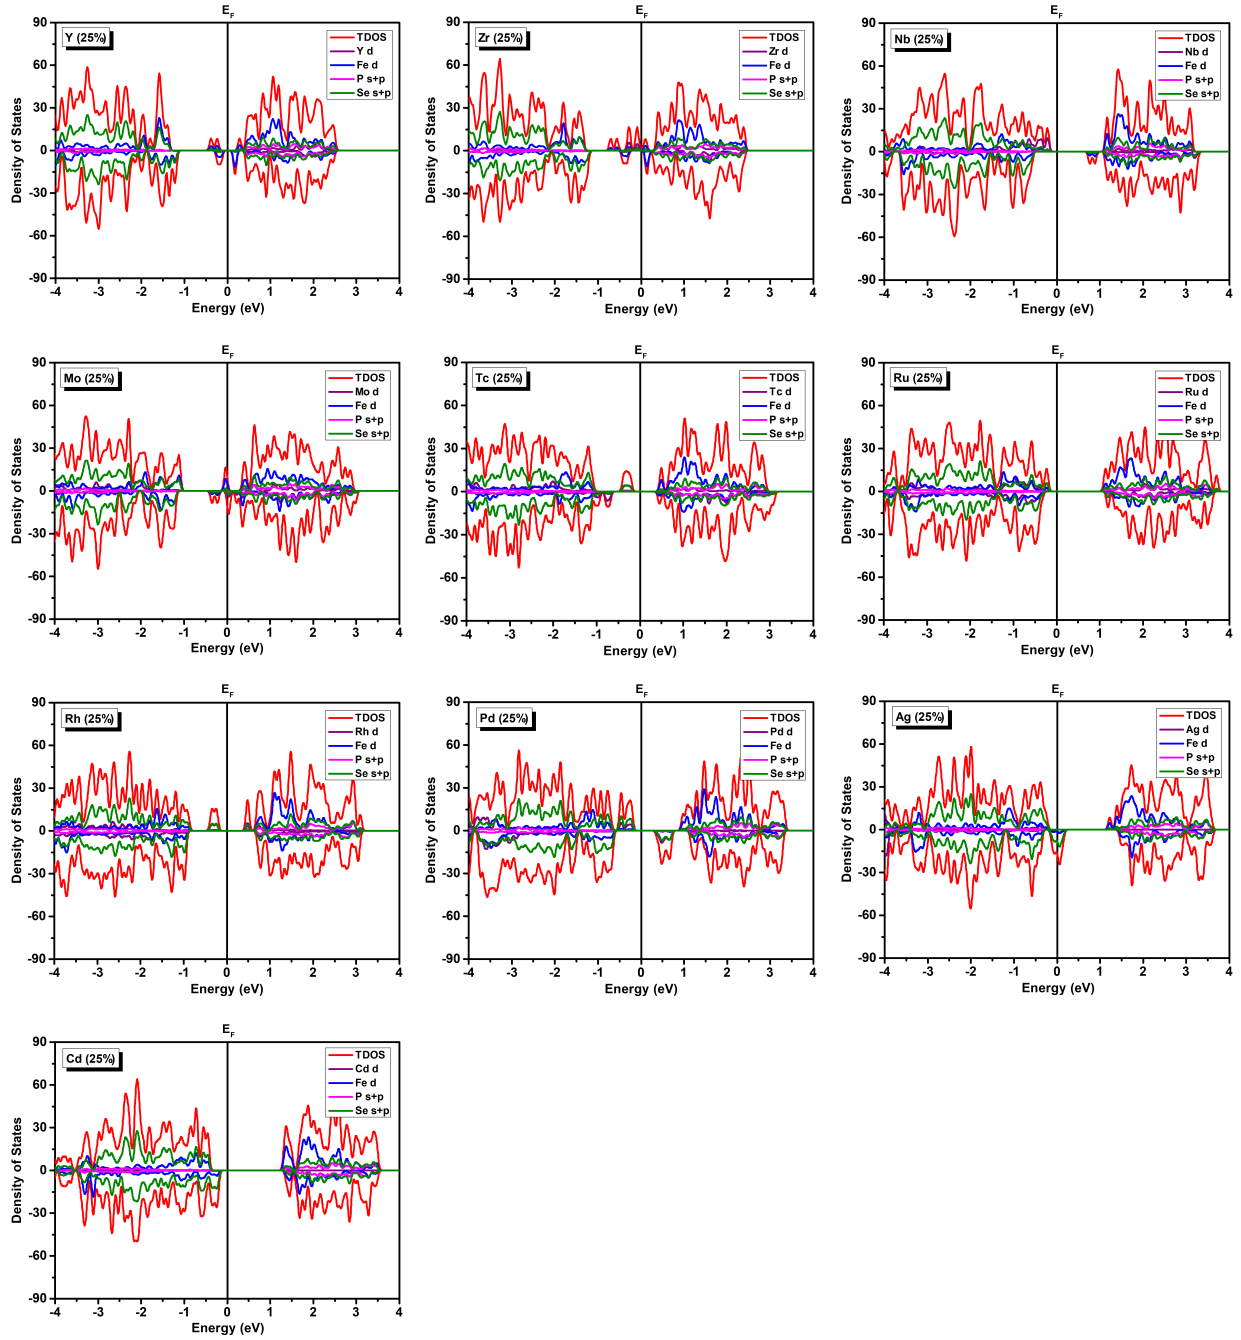

Figure S4: Total as well as the partial DOS of 4d TM-doped  $\text{FePSe}_3$  monolayer with 25% doping concentration.  $E_F$  denotes the Fermi energy and is represented by a black colored solid vertical line.
